# Supplementary material for: The Effect of Training on Erythrocyte Energy Status and Plasma Purine Metabolites in Athletes
Source: PubMed Central journal article supplement (PMC7022963; doi:10.3390/metabo10010005), 2019-12-19
Supplement: metabolites-10-00005-s001.pdf [file metabolites-10-00005-s001.pdf]

## Supplementary File

**Table S1.** Red blood cell guanine nucleotides (GTP, GDP, GMP) concentration, total guanine nucleotide (TGN), guanylate energy charge (GEC), at rest, post-exercise and after 30 minutes of recovery in consecutive training phases (transition, general, specific, competition) in endurance athletes ( $n = 11$ ), sprinters ( $n = 11$ ), and recreational runners ( $n = 11$ ).

| training phases | ENDURANCE     |               |               | SPRINT                     |                            |               | RECREATION    |               |               |
|-----------------|---------------|---------------|---------------|----------------------------|----------------------------|---------------|---------------|---------------|---------------|
|                 | Rest          | Post-exercise | 30' recovery  | Rest                       | Post-exercise              | 30' recovery  | Rest          | Post-exercise | 30' recovery  |
| GTP, mmol/L RBC |               |               |               |                            |                            |               |               |               |               |
| Transition      | 80.9 ± 5.23   | 80.7 ± 5.09   | 80.4 ± 4.73   | 85.7 ± 5.94                | 85.5 ± 5.65                | 85.1 ± 5.87   | 78.3 ± 5.99   | 77.9 ± 6.09   | 77.6 ± 6.58   |
| General         | 81.3 ± 4.75   | 80.4 ± 5.12   | 80.3 ± 4.90   | 85.0 ± 6.2                 | 84.6 ± 5.91                | 84.4 ± 6.14   | 78.4 ± 5.48   | 78.1 ± 5.35   | 78.0 ± 5.40   |
| Specific        | 81.1 ± 4.16   | 80.9 ± 4.8    | 80.5 ± 4.1    | 85.6 ± 6.41                | 85.6 ± 6.13                | 85.0 ± 6.52   | 78.1 ± 5.99   | 77.6 ± 6.09   | 77.4 ± 6.58   |
| Competition     | 81.2 ± 4.35   | 80.6 ± 4.37   | 80.3 ± 4.43   | 85.5 ± 6.29                | 85.2 ± 5.64                | 84.9 ± 5.95   | 78.214 ± 5.56 | 77.8 ± 5.86   | 77.7 ± 6.33   |
| GDP, mmol/L RBC |               |               |               |                            |                            |               |               |               |               |
| Transition      | 22.9 ± 3.49   | 23.2 ± 3.42   | 23.1 ± 3.60   | 25.2 ± 4.25 <sup>†</sup>   | 25.5 ± 4.55                | 25.4 ± 4.3    | 19.4 ± 4.63   | 19.7 ± 4.76   | 19.5 ± 4.75   |
| General         | 22.7 ± 3.42   | 22.9 ± 3.63   | 22.9 ± 3.57   | 25.9 ± 4.6                 | 26.0 ± 4.57                | 25.9 ± 4.54   | 19.7 ± 4.77   | 20.0 ± 4.82   | 19.8 ± 4.80   |
| Specific        | 23.0 ± 3.55   | 23.2 ± 3.43   | 23.1 ± 3.53   | 25.7 ± 4.84                | 25.8 ± 4.76                | 25.6 ± 4.79   | 19.7 ± 4.77   | 20.0 ± 4.82   | 19.8 ± 4.8    |
| Competition     | 23.3 ± 3.44   | 23.4 ± 3.33   | 23.4 ± 3.46   | 25.9 ± 4.53                | 26.0 ± 4.48                | 25.9 ± 4.5    | 19.5 ± 5.1    | 19.7 ± 5.38   | 19.6 ± 5.27   |
| GMP, mmol/L RBC |               |               |               |                            |                            |               |               |               |               |
| Transition      | 20.7 ± 3.75   | 20.5 ± 3.92   | 20.6 ± 3.77   | 22.8 ± 3.57 <sup>†</sup>   | 22.5 ± 3.59                | 22.5 ± 3.46   | 17.1 ± 4.49   | 16.8 ± 4.45   | 17.0 ± 4.66   |
| General         | 20.4 ± 3.34   | 20.0 ± 3.11   | 20.5 ± 3.14   | 22.6 ± 3.58                | 22.2 ± 3.82                | 22.4 ± 3.43   | 16.9 ± 4.41   | 16.5 ± 4.58   | 16.8 ± 4.63   |
| Specific        | 20.6 ± 3.02   | 20.2 ± 2.91   | 20.6 ± 2.91   | 23.0 ± 3.08                | 22.6 ± 3.08                | 22.7 ± 2.98   | 16.6 ± 5.15   | 16.3 ± 5.1    | 16.5 ± 5.35   |
| Competition     | 20.8 ± 2.88   | 20.5 ± 2.72   | 20.7 ± 2.88   | 22.7 ± 3.16                | 22.5 ± 3.17                | 22.6 ± 3.21   | 16.9 ± 5.03   | 16.5 ± 4.74   | 16.6 ± 5.13   |
| TGN, mmol/L RBC |               |               |               |                            |                            |               |               |               |               |
| Transition      | 124.5 ± 11.51 | 124.3 ± 11.27 | 124.1 ± 10.70 | 133.6 ± 13.01 <sup>‡</sup> | 133.6 ± 12.98 <sup>‡</sup> | 133.0 ± 12.92 | 114.7 ± 14.82 | 114.3 ± 15.01 | 114.1 ± 15.61 |
| General         | 124.4 ± 10.43 | 123.3 ± 10.61 | 123.6 ± 10.25 | 133.4 ± 13.53              | 132.8 ± 13.47              | 132.6 ± 13.22 | 114.9 ± 14.15 | 114.6 ± 14.24 | 114.5 ± 14.32 |
| Specific        | 124.7 ± 9.26  | 124.3 ± 9.9   | 124.2 ± 9.29  | 134.4 ± 13.55 <sup>‡</sup> | 133.9 ± 13.29              | 133.4 ± 13.32 | 114.0 ± 15.24 | 114.1 ± 15.48 | 113.8 ± 16.09 |
| Competition     | 125.3 ± 9.87  | 124.4 ± 9.56  | 124.4 ± 10.14 | 134.0 ± 13.35              | 133.7 ± 12.65              | 133.3 ± 13.02 | 114.3 ± 15.0  | 114.3 ± 15.87 | 113.9 ± 16.33 |
| GEC             |               |               |               |                            |                            |               |               |               |               |
| Transition      | 0.74 ± 0.023  | 0.74 ± 0.025  | 0.74 ± 0.025  | 0.74 ± 0.018               | 0.74 ± 0.019               | 0.74 ± 0.018  | 0.77 ± 0.03   | 0.77 ± 0.03   | 0.77 ± 0.03   |

|             |              |              |              |              |              |              |              |              |              |
|-------------|--------------|--------------|--------------|--------------|--------------|--------------|--------------|--------------|--------------|
| General     | 0.75 ± 0.021 | 0.75 ± 0.019 | 0.74 ± 0.020 | 0.74 ± 0.018 | 0.74 ± 0.02  | 0.74 ± 0.018 | 0.77 ± 0.032 | 0.77 ± 0.034 | 0.77 ± 0.034 |
| Specific    | 0.74 ± 0.022 | 0.75 ± 0.02  | 0.74 ± 0.021 | 0.73 ± 0.014 | 0.74 ± 0.014 | 0.73 ± 0.014 | 0.77 ± 0.036 | 0.77 ± 0.036 | 0.77 ± 0.037 |
| Competition | 0.74 ± 0.018 | 0.74 ± 0.017 | 0.74 ± 0.017 | 0.74 ± 0.015 | 0.74 ± 0.015 | 0.74 ± 0.01  | 0.77 ± 0.036 | 0.77 ± 0.035 | 0.77 ± 0.036 |

Values are given as means ± SD. † significantly different from Post-exercise ( $p \leq 0.05$ ); ‡ significantly different from 30'recovery ( $p \leq 0.05$ ). GDP - guanosine-5'- diphosphate. GEC - guanylate energy charge; was evaluated according to the formula by Atkinson  $GEC = ([GTP] + 0.5[GDP]) / ([GTP] + [GDP] + [GMP])$ . GMP - guanosine-5'- monophosphate. GTP - guanosine-5'- triphosphate. TGN - total guanine nucleotides =  $[GTP] + [GDP] + [GMP]$ .
